# Supplementary material for: Ultra-thin amphiphilic hydrogel electrolyte for flexible zinc-ion paper batteries
Source: Royal Society of Chemistry journal article supplement (doi:10.1039/d4ee01993h), 2024-01-01
Supplement: d4ee01993h4.pdf [file d4ee01993h4.pdf]

## Ultra-Thin Amphiphilic Hydrogel Electrolyte for Flexible Zinc-ion Paper Batteries

Huan Xia<sup>1#</sup>, Wei Zhang<sup>1#\*</sup>, Chunyang Miao<sup>2\*</sup>, Hao Chen<sup>3</sup>, Chengjie Yi<sup>1</sup>, Yihan Shang<sup>4</sup>, Tao Shui<sup>1</sup>, Xin Cao<sup>1</sup>, Jiacheng Liu<sup>5</sup>, Song-Zhu Kure-Chu<sup>5</sup>, Feifei Liang<sup>6</sup>, Nosipho Moloto<sup>7</sup>, Yipeng Xiong<sup>1</sup>, Takehiko Hihara<sup>5</sup>, Weibing Lu<sup>3\*</sup>, ZhengMing Sun<sup>1\*</sup>

<sup>1</sup>School of Materials Science and Engineering, Southeast University, Nanjing, 211189, China.

<sup>2</sup>Jiangsu National Synergetic Innovation Center for Advanced Materials, Key Laboratory of Flexible Electronics and Institute of Advanced Materials, Nanjing Tech University, Nanjing, 211816, China.

<sup>3</sup>Center for Flexible RF Technology, State Key Lab of Millimeter waves, School of Information Science and Engineering, Southeast University, Nanjing, 210018, China.

<sup>4</sup>School of Electrical and Electronic Engineering, Nanyang Technological University, Singapore, 639798, Singapore.

<sup>5</sup>Department of Materials Function and Design, Nagoya Institute of Technology, Gokiso-cho, Showa-ku, Nagoya, Aichi, 4668555, Japan.

<sup>6</sup>Contemporary Amperex Technology Co., Ltd., Ningde, 352100, China.

<sup>7</sup>Molecular Science Institute, School of Chemistry, University of the Witwatersrand, Private Bag 3, Wits, 2050, South Africa.

\*Corresponding authors: w69zhang@seu.edu.cn; iamcymiao@njtech.edu.cn; wblu@seu.edu.cn; zmsun@seu.edu.cn

#Huan Xia and Wei Zhang contributed equally to this work.

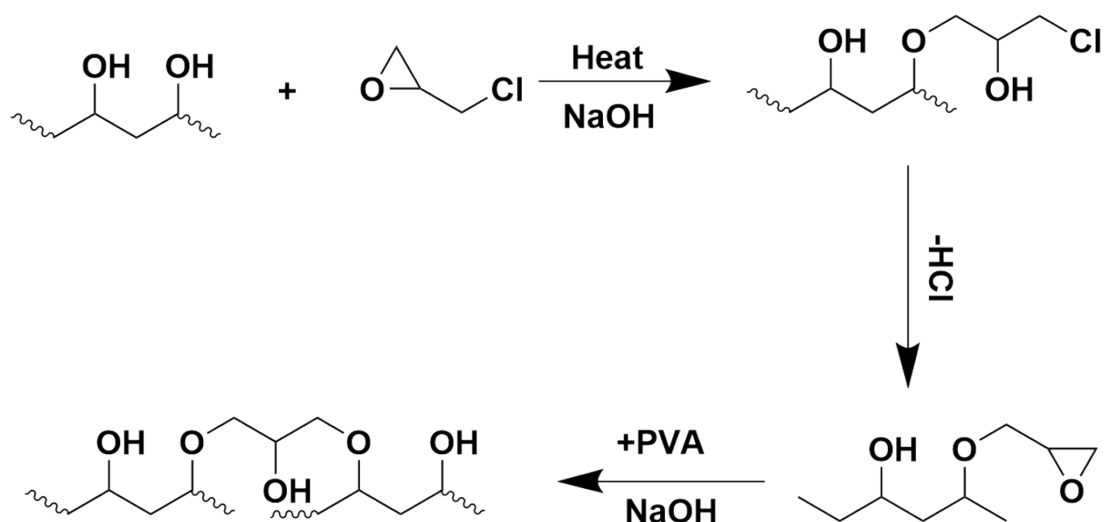

Figure S1. Synthetic diagram of chemically crosslinked PVA.

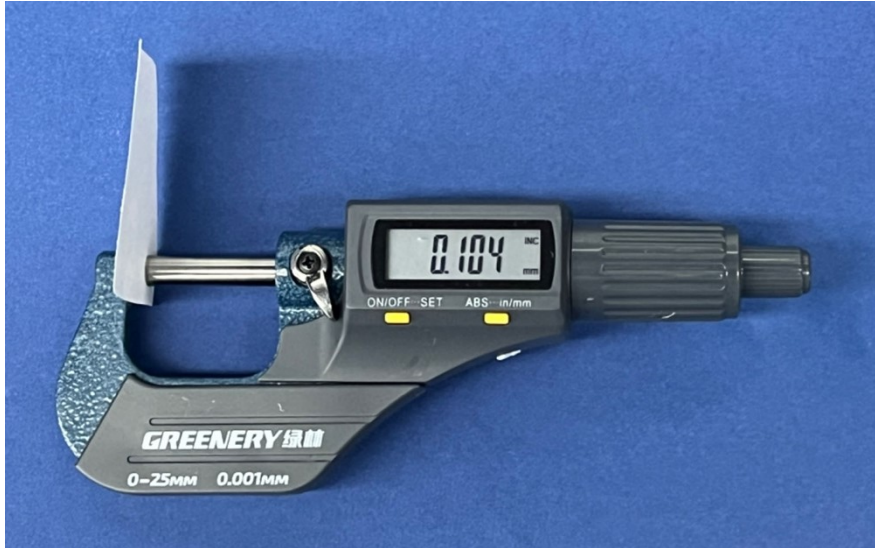

**Figure S2.** The thickness of an A4 sheet of paper measured by a spiral micrometer.

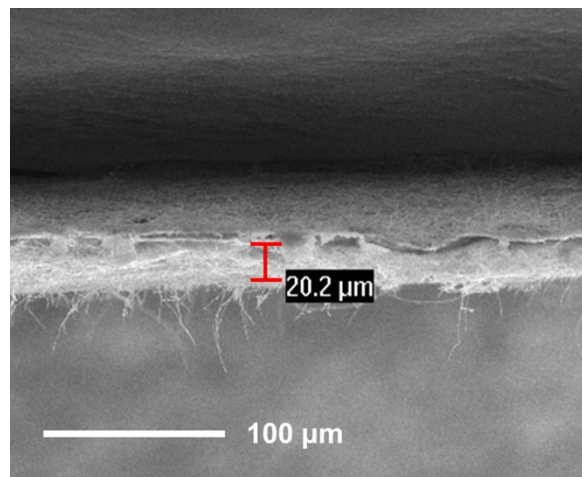

**Figure S3.** SEM image of the cross-section of the C-PVA/PAN hydrogel.

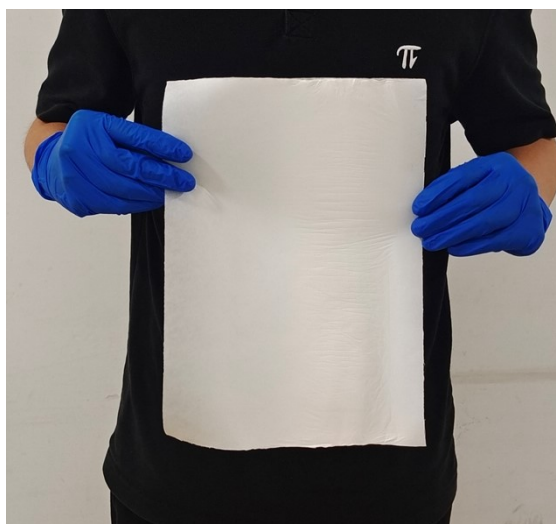

Figure S4. Optical photograph of the freeze-dried hydrogel.

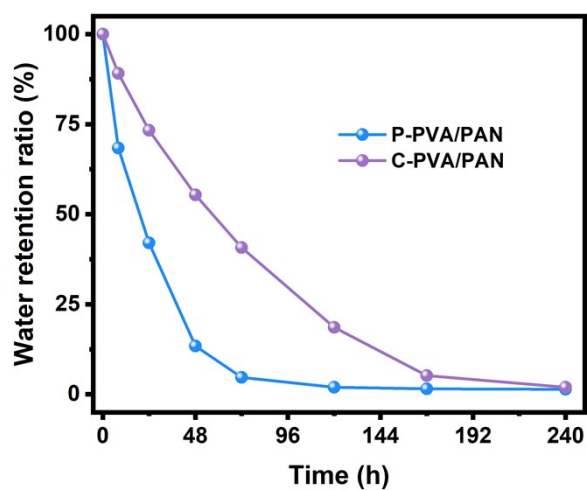

Figure S5. The water retentions of P-PVA/PAN and C-PVA/PAN stored under 25 °C.

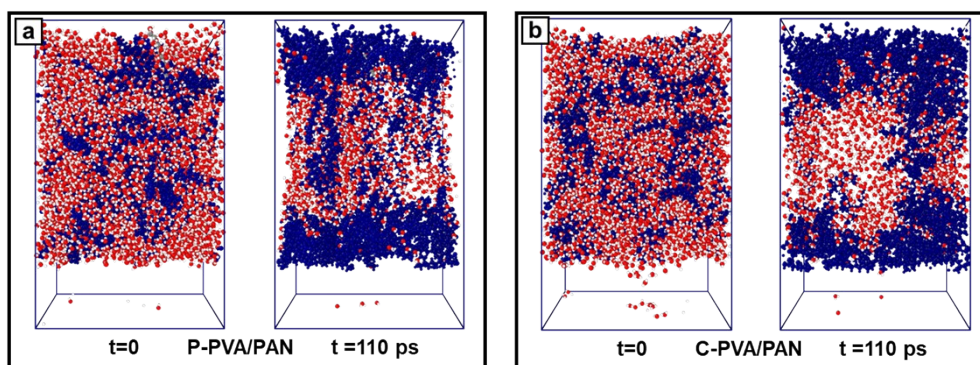

Figure S6. MD simulation diagram of water molecule binding at different time points in (a) P-PVA/PAN and (b) C-PVA/PAN systems.

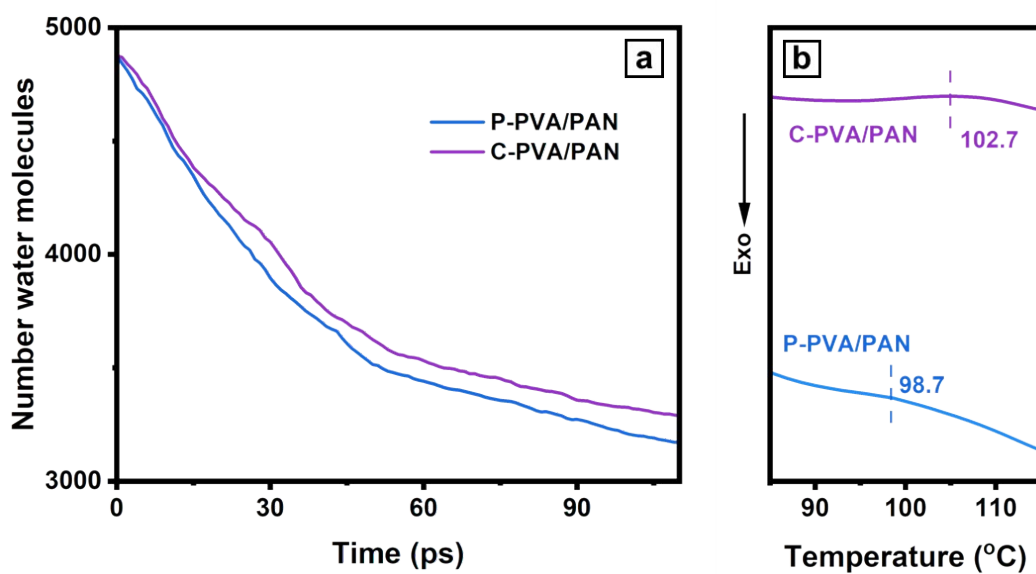

**Figure S7.** (a) The curve of the residual amount of water molecules with time. (b) DSC curve of P-PVA/PAN and C-PVA/PAN electrolyte.

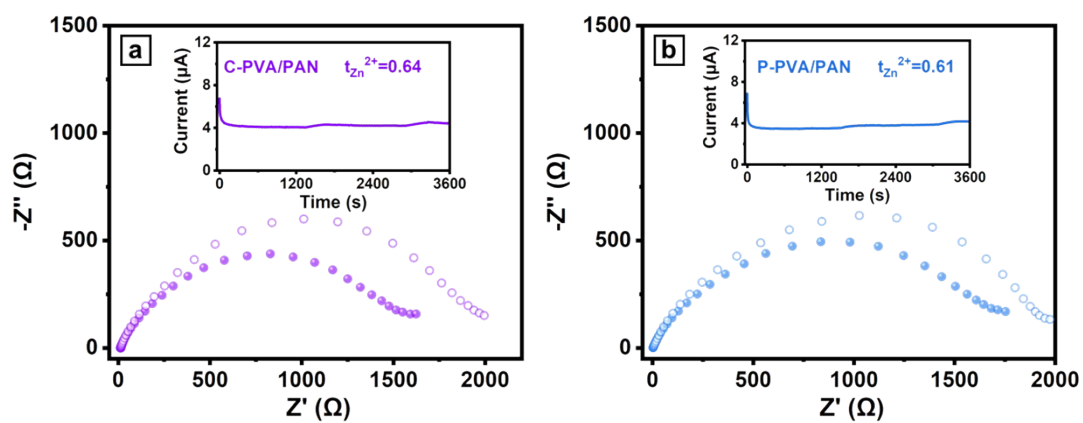

**Figure S8.** EIS spectra of the (a) Zn||C-PVA/PAN||Zn or (b) Zn||P-PVA/PAN||Zn symmetric cell before and after polarization, inset: variation of current with time during polarization at an applied voltage of 10 mV.

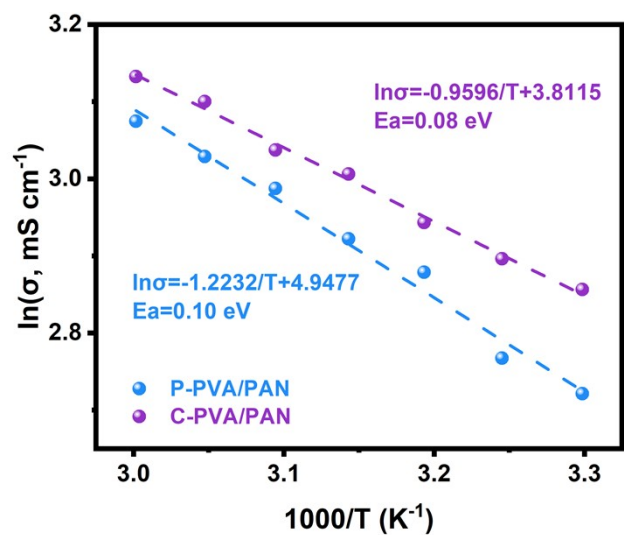

**Figure S9.** Corresponding Arrhenius curves and comparison of activation energies in P-PVA/PAN and C-PVA/PAN electrolytes.

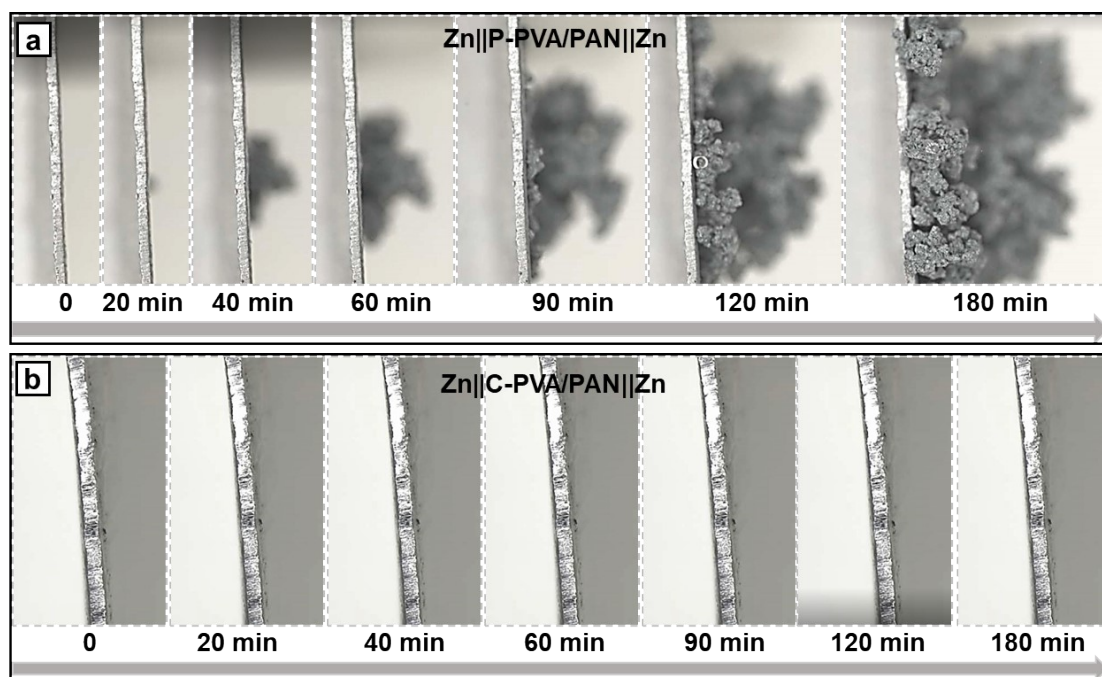

**Figure S10.** The in-situ optical images of the Zn plating behaviors with (a) P-PVA/PAN and (b) C-PVA/PAN electrolyte at  $10 \text{ mA cm}^{-2}$ .

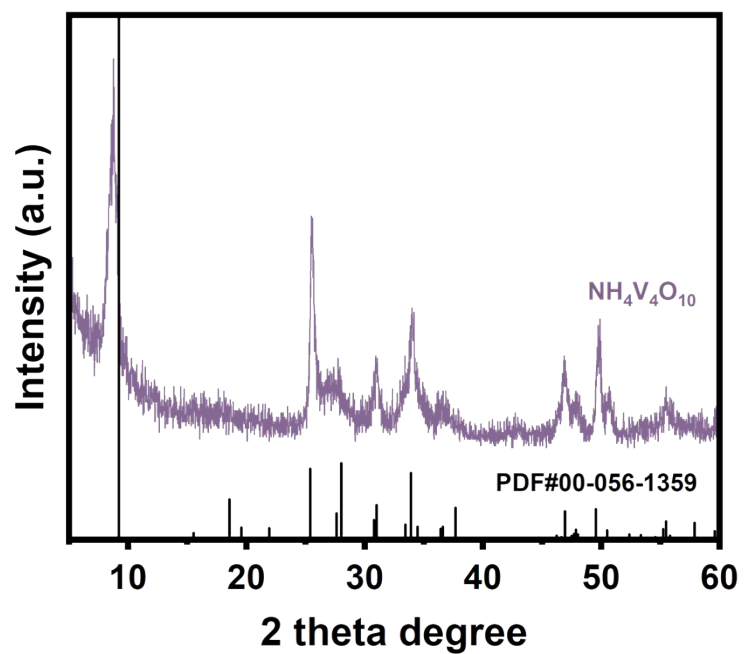

**Figure S11.** XRD pattern of the  $\text{NH}_4\text{V}_4\text{O}_{10}$  synthesized by hydrothermal method.

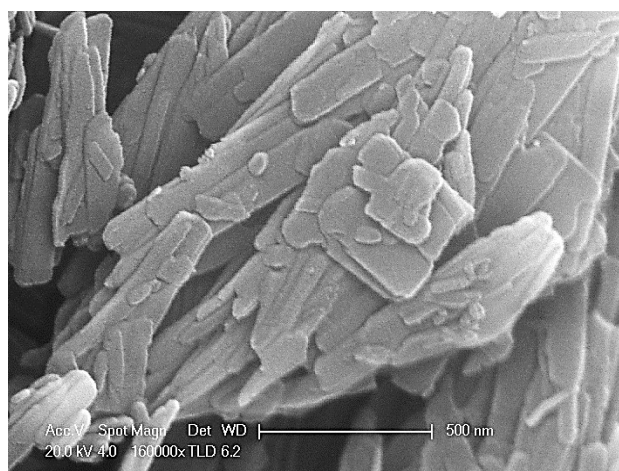

**Figure S12.** SEM image of the  $\text{NH}_4\text{V}_4\text{O}_{10}$  synthesized by hydrothermal method.

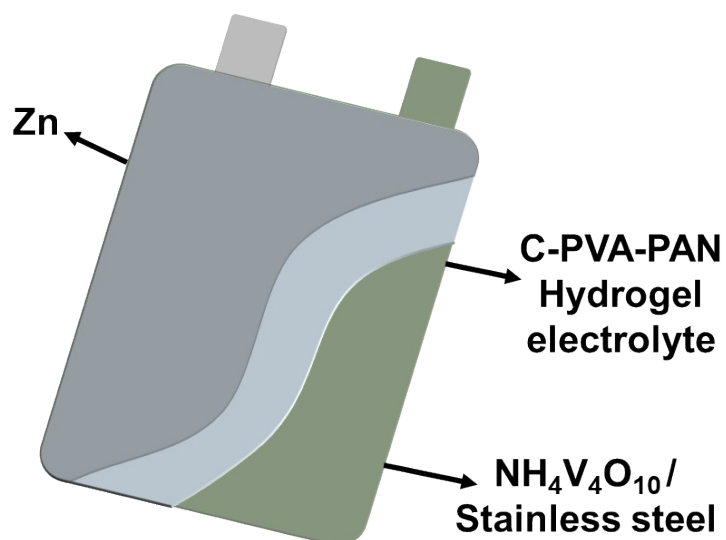

**Figure S13.** Schematic diagram of a flexible Zn||C-PVA/PAN|| NH<sub>4</sub>V<sub>4</sub>O<sub>10</sub> battery.

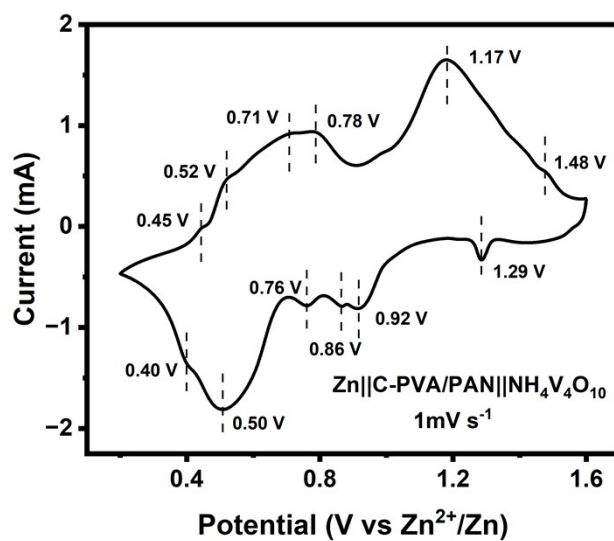

**Figure S14.** CV curves of Zn||C-PVA/PAN||NH<sub>4</sub>V<sub>4</sub>O<sub>10</sub> battery in the range of 0.2 to 1.6 V at 1mV s<sup>-1</sup>.



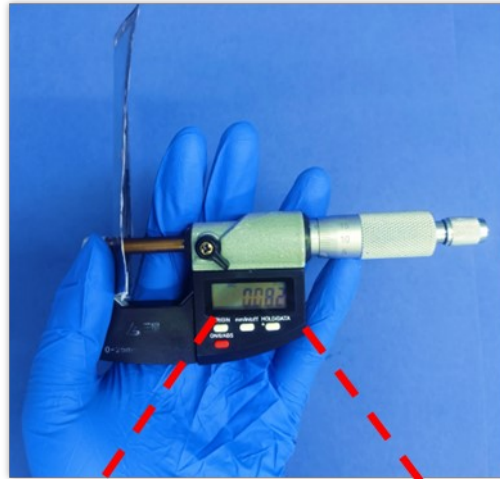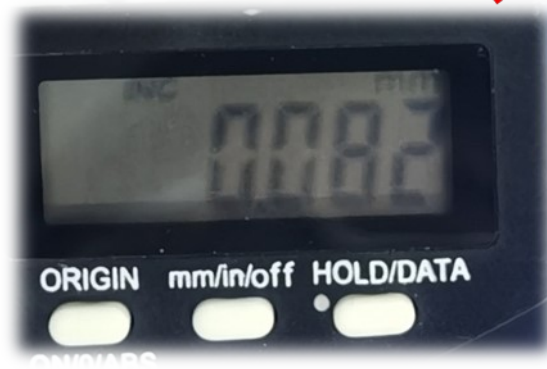

**Figure S15.** Unencapsulated flexible Zn||C-PVA/PAN|| NH<sub>4</sub>V<sub>4</sub>O<sub>10</sub> with thickness of 82  $\mu\text{m}$ .

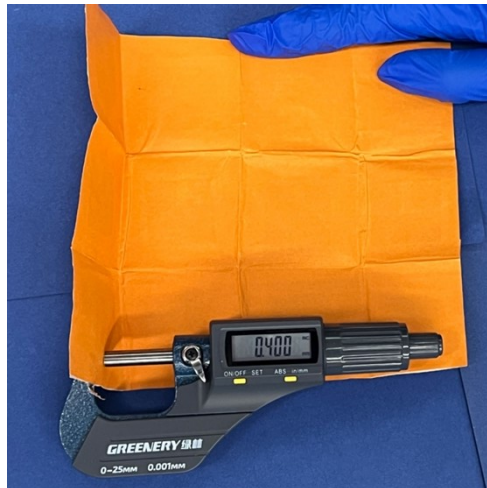

**Figure S16.** Encapsulated flexible Zn||C-PVA/PAN|| NH<sub>4</sub>V<sub>4</sub>O<sub>10</sub> with thickness of 400  $\mu\text{m}$ .



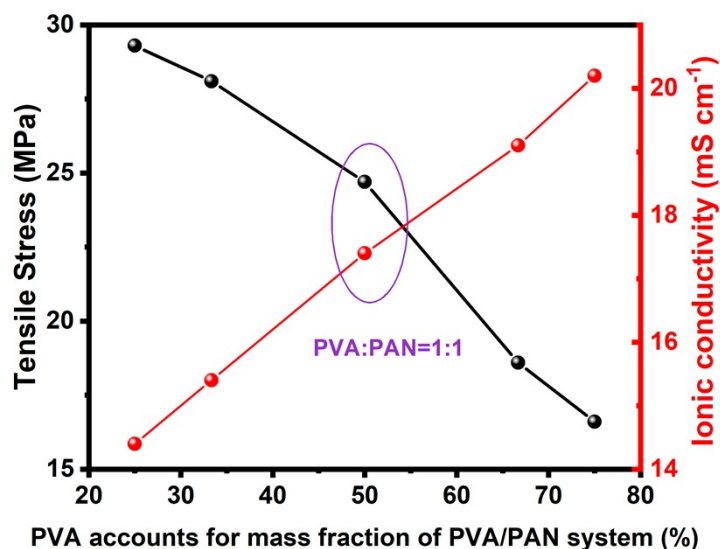

**Figure S17.** Graph of the relative content of PVA and PAN in the hydrogel electrolyte with mechanical properties and ionic conductivity.

**Table S1.** The specific capacity at a low current density and the thickness of hydrogel electrolytes with state-of-the-art flexible ZIBs.

| Cathodes                                                     | Hydrogel electrolytes | Current density (A g <sup>-1</sup> ) | Specific capacity (mAh g <sup>-1</sup> ) | Thickness (μm) | Reference |
|--------------------------------------------------------------|-----------------------|--------------------------------------|------------------------------------------|----------------|-----------|
| MnO <sub>2</sub>                                             | ADC-gel               | 0.2                                  | 300                                      | 1200           | [1]       |
| V <sub>2</sub> O <sub>5</sub> ·V <sub>3</sub> O <sub>7</sub> | PAM                   | 0.1                                  | 445                                      | 1000           | [2]       |
| PANI                                                         | ZIS-PVA               | 0.1                                  | 151.2                                    | 1000           | [3]       |
| MnO <sub>2</sub>                                             | XG                    | 0.1                                  | 211                                      | 300            | [4]       |
| MnO <sub>2</sub>                                             | Guar Gum              | 0.3                                  | 208.2                                    | 250            | [5]       |
| MnO <sub>2</sub>                                             | PZIB                  | 0.308                                | 341.5                                    | 198            | [6]       |
| V <sub>2</sub> O <sub>5</sub>                                | PAX-G                 | 0.2                                  | 217                                      | 70             | [7]       |
| NH <sub>4</sub> V <sub>4</sub> O <sub>10</sub>               | C-PVA/PAN             | 0.1                                  | 501                                      | 20             | This work |
| NH <sub>4</sub> V <sub>4</sub> O <sub>10</sub>               | C-PVA/PAN             | 0.2                                  | 480                                      |                |           |
| NH <sub>4</sub> V <sub>4</sub> O <sub>10</sub>               | C-PVA/PAN             | 0.5                                  | 356                                      |                |           |

**Table S2.** The specific capacity at a low current density with state-of-the-art flexible ZIBs.

| Cathodes                                                 | Hydrogel electrolytes | Current density (A g <sup>-1</sup> ) | Specific capacity (mAh g <sup>-1</sup> ) | Reference |
|----------------------------------------------------------|-----------------------|--------------------------------------|------------------------------------------|-----------|
| VS <sub>2</sub>                                          | PVA                   | 0.1                                  | 152                                      | [8]       |
| V <sub>5</sub> O <sub>12</sub>                           | Gelatin               | 0.1                                  | 300                                      | [9]       |
| MnO <sub>2</sub>                                         | Alginate/PAM          | 0.1                                  | 300.4                                    | [10]      |
| P-NVO                                                    | PAM-PVP               | 0.1                                  | 327.4                                    | [11]      |
| NVO                                                      | PCZ                   | 0.1                                  | 329                                      | [12]      |
| MgVO                                                     | LPH                   | 0.1                                  | 341.5                                    | [13]      |
| VO <sub>2</sub>                                          | PH/MXene              | 0.1                                  | 369.9                                    | [14]      |
| V <sub>2</sub> O <sub>5</sub>                            | PSX                   | 0.1                                  | 380                                      | [15]      |
| V <sub>2</sub> O <sub>5</sub>                            | PMC                   | 0.1                                  | 405.5                                    | [16]      |
| NH <sub>4</sub> V <sub>4</sub> O <sub>10</sub>           | TA-SA                 | 0.1                                  | 409.6                                    | [17]      |
| MnO <sub>2</sub>                                         | PAM/PAANa             | 0.1                                  | 418                                      | [18]      |
| Ni <sub>0.006</sub> Ca <sub>0.0045</sub> VO <sub>2</sub> | PVA                   | 0.1                                  | 433.8                                    | [19]      |
| V <sub>2</sub> O <sub>5</sub>                            | PAMPSZn               | 0.1                                  | 438.9                                    | [20]      |
| LaV <sub>2</sub> O <sub>5</sub>                          | CD-PEO/PAM            | 0.1                                  | 439                                      | [21]      |
| NH <sub>4</sub> V <sub>4</sub> O <sub>10</sub>           | C-PVA/PAN             | 0.1                                  | 501                                      | This work |
| VS <sub>2</sub>                                          | PZHE                  | 0.2                                  | 150                                      | [22]      |
| CoFe(CN) <sub>6</sub>                                    | PAM                   | 0.2                                  | 171.64                                   | [23]      |
| PANI                                                     | SFPAM-Zr              | 0.2                                  | 191                                      | [24]      |
| Na <sub>5</sub> V <sub>12</sub> O <sub>32</sub>          | Agr-PEG               | 0.2                                  | 198.3                                    | [25]      |
| Zn <sub>3</sub> V <sub>2</sub> O <sub>8</sub>            | PDZ-H                 | 0.2                                  | 265.2                                    | [26]      |
| rGO/MnO <sub>2</sub>                                     | C-TEOS                | 0.2                                  | 277.3                                    | [27]      |
| P-NVO                                                    | PAM-PVP               | 0.2                                  | 278.1                                    | [11]      |
| MnO <sub>2</sub>                                         | GO-PVA                | 0.2                                  | 310                                      | [28]      |
| MgVO                                                     | LPH                   | 0.2                                  | 310                                      | [13]      |
| NaV <sub>3</sub> O <sub>8</sub>                          | MMT-PAM               | 0.2                                  | 312                                      | [29]      |
| ZVO                                                      | CarraChi              | 0.2                                  | 349.6                                    | [30]      |
| MnO <sub>2</sub>                                         | PAM/PAANa             | 0.2                                  | 352                                      | [18]      |
| NH <sub>4</sub> V <sub>4</sub> O <sub>10</sub>           | SA                    | 0.2                                  | 380                                      | [17]      |
| LaV <sub>2</sub> O <sub>5</sub>                          | CD-PEO/PAM            | 0.2                                  | 405                                      | [21]      |
| MnO <sub>2</sub>                                         | CPZ-H                 | 0.2                                  | 480                                      | [31]      |
| NH <sub>4</sub> V <sub>4</sub> O <sub>10</sub>           | C-PVA/PAN             | 0.2                                  | 480                                      | This work |
| VS <sub>2</sub>                                          | PZHE                  | 0.5                                  | 120                                      | [22]      |
| CoFe(CN) <sub>6</sub>                                    | PAM                   | 0.5                                  | 150                                      | [23]      |
| Zn <sub>3</sub> V <sub>2</sub> O <sub>8</sub>            | PDZ-H                 | 0.5                                  | 251.1                                    | [26]      |
| rGO/MnO <sub>2</sub>                                     | cellulose-TEOS        | 0.5                                  | 257.3                                    | [27]      |
| VO <sub>2</sub>                                          | PH/MXene              | 0.5                                  | 306.3                                    | [14]      |
| V <sub>2</sub> O <sub>5</sub>                            | PAMPSZn               | 0.5                                  | 350                                      | [20]      |
| NH <sub>4</sub> V <sub>4</sub> O <sub>10</sub>           | C-PVA/PAN             | 0.5                                  | 356                                      | This work |

## Reference

- [1] Q. He, G. Fang, Z. Chang, Y. Zhang, S. Zhou, M. Zhou, S. Chai, Y. Zhong, G. Cao, S. Liang, A. Pan, *Nano-Micro Lett.* **2022**, *14*, 93.
- [2] X. Li, L. Ma, Y. Zhao, Q. Yang, D. Wang, Z. Huang, G. Liang, F. Mo, Z. Liu, C. Zhi, *Mater. Today Energy* **2019**, *14*, 100361.
- [3] L. Li, L. Zhang, W. Guo, C. Chang, J. Wang, Z. Cong, X. Pu, *J. Mater. Chem. A* **2021**, *9*, 24325.
- [4] K. Ji, S. Li, Y. Lin, J. Zhang, M. Wang, C. Bai, D. Kong, *ACS Mater. Lett.* **2023**, *5*, 955.
- [5] Y. Huang, J. Zhang, J. Liu, Z. Li, S. Jin, Z. Li, S. Zhang, H. Zhou, *Mater. Today Energy* **2019**, *14*, 100349.
- [6] Y. Hao, D. Feng, L. Hou, T. Li, Y. Jiao, P. Wu, *Adv. Sci.* **2022**, *9*, 2104832.
- [7] Y. Deng, Y. Wu, L. Wang, K. Zhang, Y. Wang, L. Yan, *J. Colloid Interface Sci.* **2023**, *633*, 142.
- [8] J. Liu, J. Long, Z. Shen, X. Jin, T. Han, T. Si, H. Zhang, *Adv. Sci.* **2021**, *8*, 2004689.
- [9] N. Zhang, M. Jia, Y. Dong, Y. Wang, J. Xu, Y. Liu, L. Jiao, F. Cheng, *Adv. Funct. Mater.* **2019**, *29*, 1807331.
- [10] Z. Liu, D. Wang, Z. Tang, G. Liang, Q. Yang, H. Li, L. Ma, F. Mo, C. Zhi, *Energy Storage Mater.* **2019**, *23*, 636.
- [11] Y. Lu, Z. Wang, M. Li, Z. Li, X. Hu, Q. Xu, Y. Wang, H. Liu, Y. Wang, *Adv. Funct. Mater.* **2024**, *34*, 2310966.
- [12] H. Zhang, X. Gan, Z. Song, J. Zhou, *Angew. Chem. Int. Ed.* **2023**, *62*, e202217833.
- [13] Z. Li, G. Zhou, L. Ye, J. He, W. Xu, S. Hong, W. Chen, M.-C. Li, C. Liu, C. Mei, *Chem. Eng. J.* **2023**, *472*, 144992.
- [14] J. Feng, D. Ma, K. Ouyang, M. Yang, Y. Wang, J. Qiu, T. Chen, J. Zhao, B. Yong, Y. Xie, H. Mi, L. Sun, C. He, P. Zhang, *Adv. Funct. Mater.* **2022**, *32*, 2207909.
- [15] C. Fu, Y. Wang, C. Lu, S. Zhou, Q. He, Y. Hu, M. Feng, Y. Wan, J. Lin, Y. Zhang, A. Pan, *Energy Storage Mater.* **2022**, *51*, 588.
- [16] P. Lin, J. Cong, J. Li, M. Zhang, P. Lai, J. Zeng, Y. Yang, J. Zhao, *Energy Storage Mater.* **2022**, *49*, 172.
- [17] B. Zhang, L. Qin, Y. Fang, Y. Chai, X. Xie, B. Lu, S. Liang, J. Zhou, *Sci. Bull.* **2022**, *67*, 955.
- [18] Z. Shen, Z. Tang, C. Li, L. Luo, J. Pu, Z. Wen, Y. Liu, Y. Ji, J. Xie, L. Wang, Y. Yao, G. Hong, *Adv. Energy Mater.* **2021**, *11*, 2102055.
- [19] X. Zhao, L. Mao, Q. Cheng, F. Liao, G. Yang, L. Chen, *Carbon* **2022**, *186*, 160.
- [20] J. Cong, X. Shen, Z. Wen, X. Wang, L. Peng, J. Zeng, J. Zhao, *Energy Storage Mater.* **2021**, *35*, 586.
- [21] H. Xia, G. Xu, X. Cao, C. Miao, H. Zhang, P. Chen, Y. Zhou, W. Zhang, Z. Sun, *Adv. Mater.* **2023**, *35*, 2301996.
- [22] K. Leng, G. Li, J. Guo, X. Zhang, A. Wang, X. Liu, J. Luo, *Adv. Funct. Mater.* **2020**, *30*, 2001317.
- [23] L. Ma, S. Chen, C. Long, X. Li, Y. Zhao, Z. Liu, Z. Huang, B. Dong, J. A. Zapien, C. Zhi, *Adv. Energy Mater.* **2019**, *9*, 1902446.
- [24] Y. Cheng, Y. Jiao, P. Wu, *Energy Environ. Sci.* **2023**, *16*, 4561.

- [25] Y. Meng, L. Zhang, M. Peng, D. Shen, C. Zhu, S. Qian, J. Liu, Y. Cao, C. Yan, J. Zhou, T. Qian, *Adv. Funct. Mater.* **2022**, *32*, 2206653.
- [26] H. Lu, J. Hu, L. Wang, J. Li, X. Ma, Z. Zhu, H. Li, Y. Zhao, Y. Li, J. Zhao, B. Xu, *Adv. Funct. Mater.* **2022**, *32*, 2112540.
- [27] M. Chen, J. Chen, W. Zhou, X. Han, Y. Yao, C.-P. Wong, *Adv. Mater.* **2021**, *33*, 2007559.
- [28] X. Xiao, X. Xiao, Y. Zhou, X. Zhao, G. Chen, Z. Liu, Z. Wang, C. Lu, M. Hu, A. Nashalian, S. Shen, K. Xie, W. Yang, Y. Gong, W. Ding, P. Servati, C. Han, S. X. Dou, W. Li, J. Chen, *Sci. Adv.* **2021**, *7*, eabl3742.
- [29] S. Ji, J. Qin, S. Yang, P. Shen, Y. Hu, K. Yang, H. Luo, J. Xu, *Energy Storage Mater.* **2023**, *55*, 236.
- [30] F. Wang, J. Zhang, H. Lu, H. Zhu, Z. Chen, L. Wang, J. Yu, C. You, W. Li, J. Song, Z. Weng, C. Yang, Q.-H. Yang, *Nat. Commun.* **2023**, *14*, 4211.
- [31] H. Lu, J. Hu, X. Wei, K. Zhang, X. Xiao, J. Zhao, Q. Hu, J. Yu, G. Zhou, B. Xu, *Nat. Commun.* **2023**, *14*, 4435.
